# Supplementary material for: Clusters of Physical Frailty and Cognitive Impairment and Their Associated Comorbidities in Older Primary Care Patients
Source: MDPI journal article supplement (doi:10.3390/healthcare9070891), 2021-07-15
Supplement: s1 [file s1]

**Table 1***Descriptive statistics of numerical variables*

| Parameter                                                     | Min   | Max    | Median (interquartile range) | Mean (standard deviation) |
|---------------------------------------------------------------|-------|--------|------------------------------|---------------------------|
| Age (years)                                                   | 60    | 90     | 71 (10)                      | 71.11 (6.36)              |
| BMI (kg/m <sup>2</sup> )                                      | 19.02 | 46.05  | 29.67 (5.73)                 | 30.19 (4.49)              |
| Waist circumference (cm)                                      | 50.00 | 143.00 | 99.00 (16)                   | 99.91 (12.01)             |
| Mid arm circumference (cm)                                    | 18.00 | 45.00  | 31.00 (5)                    | 31.41 (3.59)              |
| A total number of diagnoses                                   | 0     | 10     | 3 (2)                        | 3 (1.79)                  |
| A total number of prescribed medications                      | 0     | 15     | 3 (3)                        | 4 (2.15)                  |
| A total number of medications with effect on mental functions | 0     | 9      | 3 (2)                        | 3 (1.67)                  |
| A total number of sensory/functional disorders                | 0     | 5      | 2 (2)                        | 2 (1.05)                  |
| Fasting glucose (mmol/L)                                      | 3.60  | 16.20  | 5.60 (1.7)                   | 6.24 (1.94)               |

|                                                             |       |        |             |                |
|-------------------------------------------------------------|-------|--------|-------------|----------------|
| Total cholesterol<br>(mmol/L)                               | 2.90  | 9.70   | 5.70 (1,7)  | 5.76 (1.34)    |
| LDL cholesterol<br>(mmol/L)                                 | 1.20  | 8.90   | 3.50 (1.4)  | 3.58 (1.20)    |
| HDL cholesterol<br>(mmol/L)                                 | 0.60  | 2.30   | 1.40 (0.4)  | 1.39 (0.32)    |
| Triglycerides<br>(mmol/L)                                   | 0.60  | 7.70   | 1.70 (09)   | 1.82 (0.94)    |
| Glomerular filtration<br>rate (mL/min/1.73 m <sup>2</sup> ) | 18.00 | 191.00 | 85.00 (37)  | 86.42 (26.84)  |
| C-reactive protein<br>(mg/L)                                | 0.20  | 25.00  | 2.20 (3.2)  | 3.56 (3.98)    |
| Haemoglobin (g/L)                                           | 54.00 | 177.00 | 138.00 (15) | 137.10 (13.46) |
| Erythrocyte number<br>(x 10 <sup>12</sup> /L)               | 2.70  | 5.87   | 4.59 (0.5)  | 4.57 (0.43)    |

---

**Table 2***Descriptive statistics of categorical variables*

| Parameter                                                                                          | Values (%)                                                      |
|----------------------------------------------------------------------------------------------------|-----------------------------------------------------------------|
| Gender                                                                                             | M – 35<br>F – 65                                                |
| Hypertension                                                                                       | Yes (< 10 years) - 33<br>Yes ( $\geq$ 10 years) - 45<br>No - 22 |
| Diabetes mellitus type 2                                                                           | Less (< 5 years) - 10<br>More ( $\geq$ 5 years) - 13<br>No - 77 |
| Chronic obstructive pulmonary disease                                                              | Yes - 5<br>No - 95                                              |
| Asthma or allergic rhinitis                                                                        | Yes - 8<br>No - 92                                              |
| Chronic heart disease (failure)                                                                    | Yes- 15<br>No - 246                                             |
| Coronary artery disease                                                                            | Yes - 12<br>No - 88                                             |
| Cerebrovascular disease                                                                            | Yes - 7<br>No - 93                                              |
| Periphery artery disease                                                                           | Yes - 3<br>No - 97                                              |
| Upper gastro-intestinal tract disorders                                                            | Yes - 43<br>No - 57                                             |
| Chronic hepatic disorders                                                                          | Yes – 0.03<br>No – 99.97                                        |
| Malignant disease (excluding terminal phase and patients under active treatment, also skin tumors) | Yes - 11<br>No - 89                                             |
| Osteoporosis (diagnosis confirmed)                                                                 | Yes - 10                                                        |

|                                                                                                                                      |                                                                       |
|--------------------------------------------------------------------------------------------------------------------------------------|-----------------------------------------------------------------------|
|                                                                                                                                      | No - 90                                                               |
| Severe osteoarthritis (OA of major ankles - 3 or more attacks a year or deformities or continuous pain) or dg of rheumatic arthritis | Yes - 39<br>No - 61                                                   |
| Syndroma lumbale (long lasting or frequently repeated)                                                                               | Yes - 39<br>No - 61                                                   |
| Parkinson`s disease                                                                                                                  | Yes - 2<br>No - 98                                                    |
| Urogenital diseases (chronic cystitis/ pyelonephritis, hyperplasio prostatae – M)                                                    | Yes - 13<br>No - 87                                                   |
| Thyroid gland disorders                                                                                                              | Yes - 6<br>No - 94                                                    |
| Anxiety/depression (excluding psychosis and dementias)                                                                               | Yes - 46<br>No - 54                                                   |
| Incontinent and other urinary bladder disorders (having a urinary catheter, taking pads or anamnesis of urinary bladder disorders)   | Yes - 5<br>No - 95                                                    |
| Significant visus loss                                                                                                               | Yes - 86<br>No - 14                                                   |
| Registered hearing impairment or communication difficulties due to hearing loss                                                      | Yes - 26<br>No - 74                                                   |
| Experienced falls                                                                                                                    | A fall with a fracture - 3<br>A fall without fracture - 25<br>No - 72 |
| Walking with support or visible impaired                                                                                             | Yes - 7<br>No - 93                                                    |
| Complaints on chronic pain                                                                                                           | Yes - 39<br>No - 61                                                   |
| Dg of chronic diseases                                                                                                               | <3 - 107<br>≥3 - 154                                                  |

---
